# Supplementary material
Source: PubMed Central journal article supplement (PMC5107172)
Supplement: NIHMS813401-supplement-3.pdf [file NIHMS813401-supplement-3.pdf]

## Top 5 over-enriched pathways from Pathway Interaction Database

### AR Binding Sites - Shared E2 and DHT

| <u>p-value</u> | <u>q-value</u> | <u>pathway</u>                                                             |
|----------------|----------------|----------------------------------------------------------------------------|
| 3.69E-04       | 2.41E-01       | FOXA1 transcription factor network                                         |
| 1.32E-03       | 2.41E-01       | Validated targets of C-MYC transcriptional repression                      |
| 1.63E-03       | 2.41E-01       | Validated nuclear estrogen receptor alpha network                          |
| 2.28E-03       | 2.41E-01       | Regulation of nuclear beta catenin signaling and target gene transcription |
| 2.70E-03       | 2.41E-01       | Notch-mediated HES/HEY network                                             |

### AR Binding Sites - E2 Only

| <u>p-value</u> | <u>q-value</u> | <u>pathway</u>                                                         |
|----------------|----------------|------------------------------------------------------------------------|
| 2.88E-07       | 3.74E-04       | Validated nuclear estrogen receptor alpha network                      |
| 4.65E-07       | 3.74E-04       | FOXA1 transcription factor network                                     |
| 7.19E-05       | 2.31E-02       | C-MYB transcription factor network                                     |
| 9.02E-05       | 2.42E-02       | Signaling events mediated by Hepatocyte Growth Factor Receptor (c-Met) |
| 3.08E-04       | 3.30E-02       | Calcineurin-regulated NFAT-dependent transcription in lymphocytes      |

### AR Binding Sites - DHT Only

| <u>p-value</u> | <u>q-value</u> | <u>pathway</u>                           |
|----------------|----------------|------------------------------------------|
| 1.32E-04       | 2.87E-02       | IL2-mediated signaling events            |
| 2.64E-04       | 4.39E-02       | IL2 signaling events mediated by PI3K    |
| 5.22E-04       | 4.75E-02       | Beta1 integrin cell surface interactions |
| 6.21E-04       | 4.75E-02       | FOXA1 transcription factor network       |
| 1.12E-03       | 6.24E-02       | Notch-mediated HES/HEY network           |

**Supplementary Table S2**

| Gene            | Common_name  | Control_mean | Treatment_mean | Fold_change | P-value | Q-value |
|-----------------|--------------|--------------|----------------|-------------|---------|---------|
| ENSG00000010438 | PRSS3        | 24.37        | 73.87          | 3.03        | 0.0113  | 0.1508  |
| ENSG00000134258 | VTCN1        | 3.51         | 9.58           | 2.73        | 0.0138  | 0.1617  |
| ENSG00000174156 | GSTA3        | 8.43         | 22.21          | 2.63        | 0.0049  | 0.1124  |
| ENSG00000188257 | PLA2G2A      | 3.37         | 8.42           | 2.5         | 0.0007  | 0.0624  |
| ENSG00000110484 | SCGB2A2      | 356.13       | 891.58         | 2.5         | 0.0027  | 0.0964  |
| ENSG00000142515 | KLK3         | 4.44         | 10.88          | 2.45        | 0.0073  | 0.1309  |
| ENSG00000124935 | SCGB1D2      | 80.95        | 192.47         | 2.38        | 0.0113  | 0.1508  |
| ENSG00000120875 | DUSP4        | 14.09        | 32.95          | 2.34        | 0.0039  | 0.1025  |
| ENSG00000096088 | PGC          | 21.54        | 48.65          | 2.26        | 0.0008  | 0.0643  |
| ENSG00000173467 | AGR3         | 12.74        | 26.92          | 2.11        | 0.0093  | 0.1449  |
| ENSG00000129654 | FOXJ1        | 40.02        | 79.71          | 1.99        | 0.0000  | 0.0194  |
| ENSG00000235123 | DSCAM-AS1    | 16.03        | 31.71          | 1.98        | 0.0037  | 0.1012  |
| ENSG00000202077 | U1           | 12.27        | 23.9           | 1.95        | 0.0292  | 0.2169  |
| ENSG00000178372 | CALML5       | 34.57        | 66.74          | 1.93        | 0.0007  | 0.0624  |
| ENSG00000179902 | C1orf194     | 17.75        | 34.27          | 1.93        | 0.0007  | 0.0624  |
| ENSG00000204983 | PRSS1        | 18.02        | 34.79          | 1.93        | 0.0173  | 0.1768  |
| ENSG00000250510 | GPR162       | 7.02         | 13.46          | 1.92        | 0.0069  | 0.1274  |
| ENSG00000129990 | SYT5         | 22.9         | 43.23          | 1.89        | 0.0001  | 0.0337  |
| ENSG00000250606 | U66061.39    | 10.17        | 19.07          | 1.88        | 0.0242  | 0.2058  |
| ENSG00000238671 | SNORA78      | 9.99         | 18.7           | 1.87        | 0.0138  | 0.1617  |
| ENSG00000183569 | SERHL2       | 167          | 311.05         | 1.86        | 0.0024  | 0.0919  |
| ENSG00000188931 | C1orf192     | 13.98        | 25.7           | 1.84        | 0.0011  | 0.0685  |
| ENSG00000153347 | FAM81B       | 10.14        | 18.4           | 1.81        | 0.0006  | 0.0624  |
| ENSG00000168405 | CMAHP        | 8.52         | 15.32          | 1.8         | 0.0129  | 0.1587  |
| ENSG00000259120 | C17orf110    | 19.09        | 34.11          | 1.79        | 0.0387  | 0.2409  |
| ENSG00000163810 | TGM4         | 9.79         | 17.33          | 1.77        | 0.0056  | 0.1194  |
| ENSG00000186973 | FAM183A      | 32.16        | 55.88          | 1.74        | 0.0041  | 0.1052  |
| ENSG00000139445 | FOXN4        | 7.05         | 12.23          | 1.73        | 0.0003  | 0.0580  |
| ENSG00000159713 | TPPP3        | 56.31        | 97.22          | 1.73        | 0.0004  | 0.0580  |
| ENSG00000130513 | GDF15        | 59.25        | 102.79         | 1.73        | 0.0036  | 0.1007  |
| ENSG00000128536 | CDHR3        | 9.67         | 16.3           | 1.69        | 0.0268  | 0.2130  |
| ENSG00000243705 | RP11-178L8.1 | 72.87        | 122.49         | 1.68        | 0.0292  | 0.2169  |
| ENSG00000106541 | AGR2         | 1769.76      | 2977.25        | 1.68        | 0.0297  | 0.2192  |
| ENSG00000102003 | SYP          | 8.76         | 14.6           | 1.67        | 0.0042  | 0.1052  |
| ENSG00000145491 | ROPN1L       | 9.37         | 15.54          | 1.66        | 0.0012  | 0.0698  |
| ENSG00000121270 | ABCC11       | 13.06        | 21.68          | 1.66        | 0.0064  | 0.1257  |
| ENSG00000124237 | C20orf85     | 13.48        | 22.29          | 1.65        | 0.0007  | 0.0624  |
| ENSG00000113296 | THBS4        | 19.32        | 31.92          | 1.65        | 0.0108  | 0.1508  |
| ENSG00000159763 | PIP          | 25.38        | 41.64          | 1.64        | 0.0281  | 0.2153  |
| ENSG00000215217 | C5orf49      | 13.35        | 21.77          | 1.63        | 0.0004  | 0.0580  |
| ENSG00000164287 | CDC20B       | 24.47        | 39.98          | 1.63        | 0.0050  | 0.1124  |
| ENSG00000172551 | MUCL1        | 27.98        | 44.16          | 1.58        | 0.0150  | 0.1670  |
| ENSG00000173947 | C1orf88      | 9.73         | 15.32          | 1.57        | 0.0031  | 0.0990  |
| ENSG00000122711 | SPINK4       | 59.37        | 93.43          | 1.57        | 0.0313  | 0.2204  |

|                 |               |         |         |      |        |        |
|-----------------|---------------|---------|---------|------|--------|--------|
| ENSG00000114115 | RBP1          | 18.52   | 28.66   | 1.55 | 0.0082 | 0.1340 |
| ENSG00000228974 | AC006483.5    | 33.35   | 51.53   | 1.55 | 0.0249 | 0.2082 |
| ENSG00000187689 | AMTN          | 39.18   | 60.85   | 1.55 | 0.0434 | 0.2538 |
| ENSG00000187134 | AKR1C1        | 17.52   | 27.04   | 1.54 | 0.0034 | 0.0990 |
| ENSG00000125398 | SOX9          | 10.61   | 16.33   | 1.54 | 0.0036 | 0.1003 |
| ENSG00000134575 | ACP2          | 114.67  | 175.81  | 1.53 | 0.0059 | 0.1212 |
| ENSG00000173221 | GLRX          | 30.92   | 47.33   | 1.53 | 0.0091 | 0.1441 |
| ENSG00000117472 | TSPAN1        | 348.03  | 529.94  | 1.52 | 0.0063 | 0.1256 |
| ENSG00000122176 | FMOD          | 79.09   | 119.73  | 1.51 | 0.0253 | 0.2095 |
| ENSG00000172183 | ISG20         | 55      | 82.91   | 1.51 | 0.0425 | 0.2522 |
| ENSG00000160188 | RSPH1         | 13.46   | 20.22   | 1.5  | 0.0059 | 0.1212 |
| ENSG00000152669 | CCNO          | 78.77   | 117.67  | 1.49 | 0.0008 | 0.0643 |
| ENSG00000064787 | BCAS1         | 64.47   | 96.06   | 1.49 | 0.0066 | 0.1257 |
| ENSG00000086548 | CEACAM6       | 1054.42 | 1569.16 | 1.49 | 0.0171 | 0.1761 |
| ENSG00000111319 | SCNN1A        | 28.4    | 41.45   | 1.46 | 0.0016 | 0.0789 |
| ENSG00000004838 | ZMYND10       | 24.42   | 35.61   | 1.46 | 0.0135 | 0.1617 |
| ENSG00000152611 | CAPSL         | 14.87   | 21.72   | 1.46 | 0.0181 | 0.1815 |
| ENSG00000076555 | ACACB         | 28.63   | 41.39   | 1.45 | 0.0067 | 0.1267 |
| ENSG00000163083 | INHBB         | 21.06   | 30.16   | 1.43 | 0.0014 | 0.0752 |
| ENSG00000253346 | CTD-3107M8.1  | 18.23   | 26.14   | 1.43 | 0.0309 | 0.2197 |
| ENSG00000092068 | SLC7A8        | 28.96   | 40.83   | 1.41 | 0.0008 | 0.0626 |
| ENSG00000078804 | TP53INP2      | 25.72   | 36.38   | 1.41 | 0.0030 | 0.0982 |
| ENSG00000231064 | RP11-263K19.4 | 16.94   | 23.92   | 1.41 | 0.0353 | 0.2335 |
| ENSG00000163898 | LIPH          | 24.57   | 34.67   | 1.41 | 0.0445 | 0.2566 |
| ENSG00000082781 | ITGB5         | 331.98  | 463.91  | 1.4  | 0.0000 | 0.0175 |
| ENSG00000173267 | SNCG          | 19.68   | 27.49   | 1.4  | 0.0068 | 0.1274 |
| ENSG00000176788 | BASP1         | 52.64   | 73.53   | 1.4  | 0.0074 | 0.1314 |
| ENSG00000115884 | SDC1          | 46.97   | 65.98   | 1.4  | 0.0116 | 0.1508 |
| ENSG00000090020 | SLC9A1        | 35.25   | 49.4    | 1.4  | 0.0125 | 0.1556 |
| ENSG00000122735 | DNAI1         | 21.6    | 30.23   | 1.4  | 0.0164 | 0.1747 |
| ENSG00000214548 | MEG3          | 17.94   | 24.95   | 1.39 | 0.0016 | 0.0789 |
| ENSG00000137267 | TUBB2A        | 32.65   | 45.37   | 1.39 | 0.0038 | 0.1012 |
| ENSG00000165272 | AQP3          | 1145.98 | 1591.1  | 1.39 | 0.0182 | 0.1823 |
| ENSG00000076864 | RAP1GAP       | 86.42   | 119.31  | 1.38 | 0.0038 | 0.1012 |
| ENSG00000168734 | PKIG          | 20.4    | 28.18   | 1.38 | 0.0096 | 0.1474 |
| ENSG00000135480 | KRT7          | 659.21  | 908.19  | 1.38 | 0.0166 | 0.1747 |
| ENSG00000157613 | CREB3L1       | 142.25  | 195.73  | 1.38 | 0.0181 | 0.1816 |
| ENSG00000165322 | ARHGAP12      | 49.49   | 68.14   | 1.38 | 0.0370 | 0.2361 |
| ENSG00000148358 | GPR107        | 83.44   | 114.86  | 1.38 | 0.0438 | 0.2542 |
| ENSG00000127528 | KLF2          | 45.66   | 62.76   | 1.37 | 0.0133 | 0.1613 |
| ENSG00000019102 | VSIG2         | 19.84   | 27.14   | 1.37 | 0.0135 | 0.1617 |
| ENSG00000005001 | PRSS22        | 30.11   | 41.13   | 1.37 | 0.0305 | 0.2195 |
| ENSG00000084207 | GSTP1         | 71.44   | 97.69   | 1.37 | 0.0443 | 0.2559 |
| ENSG00000213085 | CCDC19        | 19.82   | 26.86   | 1.36 | 0.0005 | 0.0624 |
| ENSG00000010626 | LRRC23        | 27.48   | 37.46   | 1.36 | 0.0088 | 0.1401 |
| ENSG00000198832 | RP3-412A9.11  | 42.82   | 58.2    | 1.36 | 0.0122 | 0.1540 |
| ENSG00000167080 | B4GALNT2      | 37.41   | 50.8    | 1.36 | 0.0265 | 0.2130 |

|                 |               |        |        |      |        |        |
|-----------------|---------------|--------|--------|------|--------|--------|
| ENSG00000135046 | ANXA1         | 47.65  | 64.67  | 1.36 | 0.0430 | 0.2535 |
| ENSG00000198788 | MUC2          | 480.51 | 650.83 | 1.35 | 0.0026 | 0.0957 |
| ENSG00000167646 | C19orf51      | 89.97  | 121.7  | 1.35 | 0.0065 | 0.1257 |
| ENSG00000158555 | GDPD5         | 27.05  | 36.53  | 1.35 | 0.0121 | 0.1527 |
| ENSG00000167916 | KRT24         | 167.69 | 224.57 | 1.34 | 0.0148 | 0.1664 |
| ENSG00000229028 | KRT223P       | 123.42 | 165.22 | 1.34 | 0.0165 | 0.1747 |
| ENSG00000196924 | FLNA          | 352.39 | 471.88 | 1.34 | 0.0395 | 0.2422 |
| ENSG00000129295 | LRRC6         | 17.96  | 23.9   | 1.33 | 0.0130 | 0.1587 |
| ENSG00000154553 | PDLIM3        | 23.74  | 31.67  | 1.33 | 0.0168 | 0.1752 |
| ENSG00000167653 | PSCA          | 506.04 | 671.23 | 1.33 | 0.0348 | 0.2310 |
| ENSG00000114473 | IQCG          | 21.85  | 28.91  | 1.32 | 0.0192 | 0.1853 |
| ENSG00000116885 | OSCP1         | 16.13  | 21.25  | 1.32 | 0.0268 | 0.2130 |
| ENSG00000242136 | RP11-734K21.2 | 41.53  | 54.59  | 1.31 | 0.0218 | 0.1962 |
| ENSG00000074370 | ATP2A3        | 199.78 | 259.75 | 1.3  | 0.0001 | 0.0390 |
| ENSG00000120306 | C5orf32       | 69.49  | 90.43  | 1.3  | 0.0103 | 0.1505 |
| ENSG00000100422 | CERK          | 28.8   | 37.36  | 1.3  | 0.0223 | 0.1987 |
| ENSG00000161714 | PLCD3         | 108.42 | 140.55 | 1.3  | 0.0299 | 0.2195 |
| ENSG00000125148 | MT2A          | 26.27  | 34.14  | 1.3  | 0.0382 | 0.2406 |
| ENSG00000104140 | RHOV          | 40.29  | 51.94  | 1.29 | 0.0041 | 0.1052 |
| ENSG00000110080 | ST3GAL4       | 122.4  | 158.06 | 1.29 | 0.0113 | 0.1508 |
| ENSG00000159259 | CHAF1B        | 19.15  | 24.61  | 1.29 | 0.0480 | 0.2618 |
| ENSG00000154640 | BTG3          | 19.54  | 24.92  | 1.28 | 0.0105 | 0.1505 |
| ENSG00000115468 | EFHD1         | 35.33  | 45.38  | 1.28 | 0.0109 | 0.1508 |
| ENSG00000117519 | CNN3          | 42.57  | 54.36  | 1.28 | 0.0286 | 0.2162 |
| ENSG00000159921 | GNE           | 18.68  | 23.9   | 1.28 | 0.0406 | 0.2464 |
| ENSG00000156587 | UBE2L6        | 177.35 | 226.29 | 1.28 | 0.0470 | 0.2610 |
| ENSG00000124762 | CDKN1A        | 143.27 | 182.52 | 1.27 | 0.0021 | 0.0888 |
| ENSG00000065882 | TBC1D1        | 32.88  | 41.69  | 1.27 | 0.0137 | 0.1617 |
| ENSG00000135926 | TMBIM1        | 58.94  | 74.44  | 1.26 | 0.0082 | 0.1340 |
| ENSG00000103460 | TOX3          | 20.57  | 25.83  | 1.26 | 0.0306 | 0.2195 |
| ENSG00000124635 | HIST1H2BJ     | 30.2   | 38.04  | 1.26 | 0.0309 | 0.2197 |
| ENSG00000061273 | HDAC7         | 45.75  | 57.77  | 1.26 | 0.0455 | 0.2584 |
| ENSG00000156453 | PCDH1         | 49.01  | 61.42  | 1.25 | 0.0041 | 0.1052 |
| ENSG00000126106 | TMEM53        | 23.03  | 28.76  | 1.25 | 0.0051 | 0.1124 |
| ENSG00000160862 | AZGP1         | 211.43 | 264.24 | 1.25 | 0.0189 | 0.1835 |
| ENSG00000138772 | ANXA3         | 53.51  | 66.66  | 1.25 | 0.0217 | 0.1960 |
| ENSG00000214274 | ANG           | 24.75  | 31.04  | 1.25 | 0.0434 | 0.2538 |
| ENSG00000159348 | CYB5R1        | 126.71 | 157.02 | 1.24 | 0.0042 | 0.1052 |
| ENSG00000167632 | TRAPP9        | 61.76  | 76.73  | 1.24 | 0.0137 | 0.1617 |
| ENSG00000204385 | SLC44A4       | 176.59 | 219.48 | 1.24 | 0.0162 | 0.1738 |
| ENSG00000021300 | PLEKHB1       | 63.21  | 78.1   | 1.24 | 0.0436 | 0.2541 |
| ENSG00000131238 | PPT1          | 283.81 | 349.8  | 1.23 | 0.0298 | 0.2195 |
| ENSG00000124466 | LYPD3         | 138.59 | 168.64 | 1.22 | 0.0178 | 0.1802 |
| ENSG00000123989 | CHPF          | 66.8   | 81.17  | 1.22 | 0.0309 | 0.2197 |
| ENSG00000114315 | HES1          | 46     | 55.95  | 1.22 | 0.0327 | 0.2242 |
| ENSG00000112561 | TFEB          | 23.79  | 29.07  | 1.22 | 0.0380 | 0.2399 |
| ENSG00000115616 | SLC9A2        | 32.02  | 38.85  | 1.21 | 0.0067 | 0.1261 |

|                 |           |         |         |       |        |        |
|-----------------|-----------|---------|---------|-------|--------|--------|
| ENSG00000155366 | RHOC      | 350.22  | 423.7   | 1.21  | 0.0159 | 0.1730 |
| ENSG00000122359 | ANXA11    | 503.45  | 611.28  | 1.21  | 0.0449 | 0.2570 |
| ENSG00000021355 | SERPINB1  | 54.63   | 65.38   | 1.2   | 0.0168 | 0.1752 |
| ENSG00000158710 | TAGLN2    | 403.73  | 485.18  | 1.2   | 0.0207 | 0.1924 |
| ENSG00000086062 | B4GALT1   | 229.92  | 275.92  | 1.2   | 0.0314 | 0.2204 |
| ENSG00000188603 | CLN3      | 140.34  | 168.56  | 1.2   | 0.0336 | 0.2267 |
| ENSG00000136783 | NIPSNAP3A | 38.04   | 31.78   | -1.2  | 0.0004 | 0.0580 |
| ENSG00000086666 | ZFAND6    | 63.86   | 53.2    | -1.2  | 0.0006 | 0.0624 |
| ENSG00000107643 | MAPK8     | 69.25   | 57.89   | -1.2  | 0.0015 | 0.0760 |
| ENSG00000112893 | MAN2A1    | 42.99   | 35.97   | -1.2  | 0.0029 | 0.0982 |
| ENSG00000125691 | RPL23     | 1420.41 | 1185.77 | -1.2  | 0.0045 | 0.1094 |
| ENSG00000133835 | HSD17B4   | 640.24  | 534.67  | -1.2  | 0.0050 | 0.1124 |
| ENSG00000171793 | CTPS      | 74.26   | 62.14   | -1.2  | 0.0057 | 0.1207 |
| ENSG00000138604 | GLCE      | 33.04   | 27.48   | -1.2  | 0.0058 | 0.1207 |
| ENSG00000111231 | GPN3      | 119.42  | 99.64   | -1.2  | 0.0081 | 0.1340 |
| ENSG00000166326 | TRIM44    | 38.74   | 32.19   | -1.2  | 0.0118 | 0.1516 |
| ENSG00000091527 | CDV3      | 169.25  | 140.55  | -1.2  | 0.0136 | 0.1617 |
| ENSG00000115419 | GLS       | 52.82   | 43.88   | -1.2  | 0.0170 | 0.1752 |
| ENSG00000131844 | MCCC2     | 173.93  | 145.42  | -1.2  | 0.0185 | 0.1832 |
| ENSG00000145293 | ENOPH1    | 128.09  | 106.83  | -1.2  | 0.0216 | 0.1960 |
| ENSG00000115365 | LANCL1    | 43.53   | 36.17   | -1.2  | 0.0228 | 0.2014 |
| ENSG00000149485 | FADS1     | 132.16  | 110.54  | -1.2  | 0.0242 | 0.2058 |
| ENSG00000105135 | ILVBL     | 125.62  | 104.5   | -1.2  | 0.0274 | 0.2135 |
| ENSG00000126214 | KLC1      | 120.82  | 100.44  | -1.2  | 0.0278 | 0.2151 |
| ENSG00000182481 | KPNA2     | 307.56  | 256.75  | -1.2  | 0.0317 | 0.2210 |
| ENSG00000037749 | MFAP3     | 40.46   | 33.7    | -1.2  | 0.0320 | 0.2222 |
| ENSG00000108506 | INTS2     | 41      | 34.27   | -1.2  | 0.0340 | 0.2284 |
| ENSG00000125629 | INSIG2    | 101.36  | 84.45   | -1.2  | 0.0346 | 0.2301 |
| ENSG00000078403 | MLLT10    | 33.03   | 27.46   | -1.2  | 0.0360 | 0.2353 |
| ENSG00000143590 | EFNA3     | 60.79   | 50.49   | -1.2  | 0.0372 | 0.2364 |
| ENSG00000253352 | TUG1      | 51.18   | 42.75   | -1.2  | 0.0418 | 0.2502 |
| ENSG00000122873 | CISD1     | 61.71   | 51.5    | -1.2  | 0.0448 | 0.2566 |
| ENSG00000071794 | HLTF      | 60.2    | 49.97   | -1.2  | 0.0466 | 0.2607 |
| ENSG00000116478 | HDAC1     | 105.82  | 88.25   | -1.2  | 0.0493 | 0.2657 |
| ENSG00000143353 | LYPLAL1   | 144.55  | 119.29  | -1.21 | 0.0002 | 0.0444 |
| ENSG00000136381 | IREB2     | 31.41   | 25.87   | -1.21 | 0.0002 | 0.0444 |
| ENSG00000065135 | GNAI3     | 54.61   | 45.04   | -1.21 | 0.0009 | 0.0685 |
| ENSG00000140367 | UBE2Q2    | 42.34   | 35.12   | -1.21 | 0.0011 | 0.0685 |
| ENSG00000118246 | FASTKD2   | 46.05   | 38.1    | -1.21 | 0.0019 | 0.0831 |
| ENSG00000121058 | COIL      | 77.8    | 64.38   | -1.21 | 0.0027 | 0.0964 |
| ENSG00000070214 | SLC44A1   | 30.86   | 25.44   | -1.21 | 0.0028 | 0.0974 |
| ENSG00000168036 | CTNNB1    | 283.93  | 234.23  | -1.21 | 0.0030 | 0.0982 |
| ENSG00000174442 | ZWILCH    | 43.08   | 35.64   | -1.21 | 0.0034 | 0.0990 |
| ENSG00000170340 | B3GNT2    | 33.58   | 27.86   | -1.21 | 0.0035 | 0.1003 |
| ENSG00000089902 | RCOR1     | 29.27   | 24.27   | -1.21 | 0.0038 | 0.1012 |
| ENSG00000165704 | HPRT1     | 97.84   | 80.73   | -1.21 | 0.0050 | 0.1124 |
| ENSG00000138459 | SLC35A5   | 35.1    | 29.04   | -1.21 | 0.0054 | 0.1150 |

|                 |              |        |        |       |        |        |
|-----------------|--------------|--------|--------|-------|--------|--------|
| ENSG00000204253 | AC019178.1   | 65.26  | 53.75  | -1.21 | 0.0064 | 0.1257 |
| ENSG00000115368 | WDR75        | 57.8   | 47.83  | -1.21 | 0.0069 | 0.1274 |
| ENSG00000106443 | PHF14        | 57.4   | 47.27  | -1.21 | 0.0078 | 0.1320 |
| ENSG00000089289 | IGBP1        | 57.95  | 48.01  | -1.21 | 0.0092 | 0.1446 |
| ENSG00000164134 | NAA15        | 60.13  | 49.6   | -1.21 | 0.0094 | 0.1449 |
| ENSG00000172888 | ZNF621       | 29.78  | 24.71  | -1.21 | 0.0103 | 0.1505 |
| ENSG00000198791 | CNOT7        | 166.39 | 137.88 | -1.21 | 0.0106 | 0.1505 |
| ENSG00000065150 | IPO5         | 67.77  | 55.94  | -1.21 | 0.0118 | 0.1516 |
| ENSG00000121691 | CAT          | 31.82  | 26.25  | -1.21 | 0.0169 | 0.1752 |
| ENSG00000116747 | TROVE2       | 29.3   | 24.13  | -1.21 | 0.0172 | 0.1762 |
| ENSG00000153485 | C14orf109    | 47.25  | 39.02  | -1.21 | 0.0186 | 0.1832 |
| ENSG0000006576  | PHTF2        | 41.09  | 33.95  | -1.21 | 0.0197 | 0.1886 |
| ENSG00000180185 | FAHD1        | 30.19  | 24.95  | -1.21 | 0.0201 | 0.1908 |
| ENSG00000135486 | HNRNPA1      | 133.97 | 110.31 | -1.21 | 0.0207 | 0.1924 |
| ENSG00000166037 | CEP57        | 28.98  | 23.87  | -1.21 | 0.0227 | 0.2014 |
| ENSG00000136518 | ACTL6A       | 456.41 | 375.75 | -1.21 | 0.0275 | 0.2136 |
| ENSG00000164631 | ZNF12        | 31.87  | 26.31  | -1.21 | 0.0281 | 0.2153 |
| ENSG00000109046 | WSB1         | 60.15  | 49.7   | -1.21 | 0.0321 | 0.2222 |
| ENSG00000131747 | TOP2A        | 54.8   | 45.26  | -1.21 | 0.0386 | 0.2408 |
| ENSG00000180211 | RP1-278E11.3 | 418.96 | 345.93 | -1.21 | 0.0393 | 0.2420 |
| ENSG00000138777 | PPA2         | 300.35 | 248.46 | -1.21 | 0.0425 | 0.2522 |
| ENSG00000138246 | DNAJC13      | 65.46  | 53.96  | -1.21 | 0.0437 | 0.2541 |
| ENSG00000169288 | MRPL1        | 87.09  | 71.75  | -1.21 | 0.0474 | 0.2610 |
| ENSG00000115942 | ORC2         | 63.3   | 52.49  | -1.21 | 0.0491 | 0.2656 |
| ENSG00000144677 | CTDSPL       | 85.99  | 71.12  | -1.21 | 0.0500 | 0.2674 |
| ENSG00000108406 | DHX40        | 71.45  | 58.71  | -1.22 | 0.0001 | 0.0266 |
| ENSG00000112701 | SENP6        | 42.86  | 35.18  | -1.22 | 0.0007 | 0.0624 |
| ENSG00000148690 | FRA10AC1     | 34.38  | 28.29  | -1.22 | 0.0008 | 0.0625 |
| ENSG00000130935 | NOL11        | 81.39  | 66.82  | -1.22 | 0.0011 | 0.0685 |
| ENSG00000144283 | PKP4         | 104.36 | 85.89  | -1.22 | 0.0032 | 0.0990 |
| ENSG00000172262 | ZNF131       | 48.77  | 39.88  | -1.22 | 0.0039 | 0.1025 |
| ENSG00000113387 | SUB1         | 586.97 | 482.32 | -1.22 | 0.0041 | 0.1052 |
| ENSG00000166226 | CCT2         | 827.16 | 680.59 | -1.22 | 0.0050 | 0.1124 |
| ENSG00000135766 | EGLN1        | 69.84  | 57.35  | -1.22 | 0.0052 | 0.1130 |
| ENSG00000233846 | RP11-307L3.2 | 41.9   | 34.32  | -1.22 | 0.0071 | 0.1293 |
| ENSG00000162819 | BROX         | 90.35  | 74     | -1.22 | 0.0071 | 0.1293 |
| ENSG00000165494 | PCF11        | 31.71  | 25.99  | -1.22 | 0.0105 | 0.1505 |
| ENSG00000125170 | DOK4         | 34.03  | 27.99  | -1.22 | 0.0107 | 0.1505 |
| ENSG00000124532 | MRS2         | 34.64  | 28.31  | -1.22 | 0.0123 | 0.1543 |
| ENSG00000147471 | PROSC        | 713.53 | 586.52 | -1.22 | 0.0163 | 0.1744 |
| ENSG00000113810 | SMC4         | 147.26 | 120.8  | -1.22 | 0.0203 | 0.1908 |
| ENSG00000254244 | PAICSP4      | 35.75  | 29.27  | -1.22 | 0.0245 | 0.2065 |
| ENSG00000067066 | SP100        | 37.39  | 30.65  | -1.22 | 0.0261 | 0.2129 |
| ENSG00000117139 | KDM5B        | 83.75  | 68.82  | -1.22 | 0.0267 | 0.2130 |
| ENSG00000141425 | RPRD1A       | 65.6   | 53.7   | -1.22 | 0.0279 | 0.2153 |
| ENSG00000114346 | ECT2         | 74.98  | 61.26  | -1.22 | 0.0289 | 0.2169 |
| ENSG00000169251 | NMD3         | 118.92 | 97.36  | -1.22 | 0.0354 | 0.2336 |

|                 |              |         |        |       |        |        |
|-----------------|--------------|---------|--------|-------|--------|--------|
| ENSG00000184428 | TOP1MT       | 38.08   | 31.11  | -1.22 | 0.0363 | 0.2355 |
| ENSG00000225200 | AB019441.29  | 66.77   | 54.83  | -1.22 | 0.0371 | 0.2364 |
| ENSG00000137710 | RDX          | 49.29   | 40.46  | -1.22 | 0.0379 | 0.2399 |
| ENSG00000184916 | JAG2         | 34.5    | 28.3   | -1.22 | 0.0456 | 0.2584 |
| ENSG00000117593 | DARS2        | 76.24   | 62.3   | -1.22 | 0.0497 | 0.2672 |
| ENSG00000121644 | PPPDE1       | 28.03   | 22.78  | -1.23 | 0.0001 | 0.0339 |
| ENSG00000247556 | AC012652.1   | 32.11   | 26.05  | -1.23 | 0.0005 | 0.0580 |
| ENSG00000046604 | DSG2         | 64.5    | 52.54  | -1.23 | 0.0009 | 0.0667 |
| ENSG00000183309 | ZNF623       | 40.29   | 32.84  | -1.23 | 0.0015 | 0.0760 |
| ENSG00000133706 | LARS         | 181.84  | 147.77 | -1.23 | 0.0017 | 0.0789 |
| ENSG00000115866 | DARS         | 223.01  | 180.67 | -1.23 | 0.0050 | 0.1124 |
| ENSG00000123737 | EXOSC9       | 76.18   | 62.13  | -1.23 | 0.0051 | 0.1124 |
| ENSG00000138293 | NCOA4        | 91.2    | 73.94  | -1.23 | 0.0058 | 0.1211 |
| ENSG00000187735 | TCEA1        | 33.34   | 27.12  | -1.23 | 0.0065 | 0.1257 |
| ENSG00000134717 | BTF3L4       | 83.96   | 68.01  | -1.23 | 0.0079 | 0.1320 |
| ENSG00000235582 | RP11-448G4.2 | 46.44   | 37.75  | -1.23 | 0.0082 | 0.1340 |
| ENSG00000196591 | HDAC2        | 132.19  | 107.91 | -1.23 | 0.0098 | 0.1485 |
| ENSG00000198146 | ZNF770       | 26.85   | 21.82  | -1.23 | 0.0111 | 0.1508 |
| ENSG00000156970 | BUB1B        | 35.04   | 28.44  | -1.23 | 0.0140 | 0.1617 |
| ENSG00000127334 | DYRK2        | 37.17   | 30.14  | -1.23 | 0.0169 | 0.1752 |
| ENSG00000066427 | ATXN3        | 52.03   | 42.36  | -1.23 | 0.0184 | 0.1830 |
| ENSG00000159131 | GART         | 98.15   | 79.8   | -1.23 | 0.0214 | 0.1960 |
| ENSG00000164182 | NDUFAF2      | 32.97   | 26.83  | -1.23 | 0.0243 | 0.2058 |
| ENSG00000138166 | DUSP5        | 29.46   | 24.04  | -1.23 | 0.0256 | 0.2102 |
| ENSG00000071082 | RPL31        | 1207.34 | 982.78 | -1.23 | 0.0263 | 0.2129 |
| ENSG00000088205 | DDX18        | 111.44  | 90.81  | -1.23 | 0.0306 | 0.2195 |
| ENSG00000141580 | WDR45L       | 234.17  | 189.91 | -1.23 | 0.0343 | 0.2291 |
| ENSG00000138434 | SSFA2        | 151.42  | 123.17 | -1.23 | 0.0416 | 0.2499 |
| ENSG00000130810 | PPAN         | 47.15   | 38.39  | -1.23 | 0.0434 | 0.2538 |
| ENSG00000074800 | ENO1         | 894.1   | 725.11 | -1.23 | 0.0492 | 0.2656 |
| ENSG00000169018 | FEM1B        | 30.47   | 24.52  | -1.24 | 0.0013 | 0.0736 |
| ENSG00000055044 | NOP58        | 152.58  | 123.07 | -1.24 | 0.0029 | 0.0982 |
| ENSG00000119471 | HSDL2        | 63.01   | 50.85  | -1.24 | 0.0032 | 0.0990 |
| ENSG00000149636 | DSN1         | 62.91   | 50.57  | -1.24 | 0.0050 | 0.1124 |
| ENSG00000147162 | OGT          | 67.57   | 54.5   | -1.24 | 0.0066 | 0.1257 |
| ENSG00000121089 | NACA3P       | 36.71   | 29.5   | -1.24 | 0.0079 | 0.1320 |
| ENSG00000136536 | 42070        | 95.93   | 77.48  | -1.24 | 0.0086 | 0.1382 |
| ENSG00000011260 | UTP18        | 171.33  | 138.08 | -1.24 | 0.0091 | 0.1446 |
| ENSG00000164096 | C4orf3       | 151.33  | 122.03 | -1.24 | 0.0100 | 0.1498 |
| ENSG00000170791 | CHCHD7       | 29.73   | 24.06  | -1.24 | 0.0113 | 0.1508 |
| ENSG00000118482 | PHF3         | 30.02   | 24.18  | -1.24 | 0.0115 | 0.1508 |
| ENSG00000156958 | GALK2        | 49.41   | 39.94  | -1.24 | 0.0151 | 0.1670 |
| ENSG00000133119 | RFC3         | 50.63   | 40.76  | -1.24 | 0.0166 | 0.1747 |
| ENSG00000096696 | DSP          | 135.89  | 109.61 | -1.24 | 0.0170 | 0.1752 |
| ENSG00000164163 | ABCE1        | 91.32   | 73.54  | -1.24 | 0.0306 | 0.2195 |
| ENSG00000104341 | LAPTM4B      | 231.22  | 185.86 | -1.24 | 0.0322 | 0.2225 |
| ENSG00000204370 | SDHD         | 30.41   | 24.57  | -1.24 | 0.0344 | 0.2293 |

|                 |              |        |        |       |        |        |
|-----------------|--------------|--------|--------|-------|--------|--------|
| ENSG00000064652 | SNX24        | 35.57  | 28.7   | -1.24 | 0.0361 | 0.2353 |
| ENSG00000123575 | FAM199X      | 38.04  | 30.76  | -1.24 | 0.0400 | 0.2439 |
| ENSG00000117595 | IRF6         | 163.6  | 132    | -1.24 | 0.0463 | 0.2607 |
| ENSG00000139350 | NEDD1        | 48.99  | 39.37  | -1.24 | 0.0474 | 0.2610 |
| ENSG00000170881 | RNF139       | 66.37  | 53.61  | -1.24 | 0.0492 | 0.2656 |
| ENSG00000205765 | C5orf51      | 31.63  | 25.34  | -1.25 | 0.0002 | 0.0444 |
| ENSG00000184575 | XPOT         | 110.22 | 88.34  | -1.25 | 0.0002 | 0.0444 |
| ENSG00000158373 | HIST1H2BD    | 68.59  | 54.85  | -1.25 | 0.0004 | 0.0580 |
| ENSG00000120802 | TMPO         | 140.25 | 112.63 | -1.25 | 0.0011 | 0.0685 |
| ENSG00000130741 | EIF2S3       | 100.04 | 80.16  | -1.25 | 0.0014 | 0.0753 |
| ENSG00000171262 | FAM98B       | 38.83  | 31.13  | -1.25 | 0.0022 | 0.0898 |
| ENSG00000130707 | ASS1         | 77.47  | 61.87  | -1.25 | 0.0026 | 0.0957 |
| ENSG00000124207 | CSE1L        | 143.98 | 114.86 | -1.25 | 0.0034 | 0.0990 |
| ENSG00000163104 | SMARCAD1     | 34.04  | 27.16  | -1.25 | 0.0073 | 0.1309 |
| ENSG00000087338 | GMCL1        | 35.89  | 28.77  | -1.25 | 0.0145 | 0.1643 |
| ENSG00000144224 | UBXN4        | 153.34 | 123    | -1.25 | 0.0160 | 0.1734 |
| ENSG00000163811 | WDR43        | 59.4   | 47.42  | -1.25 | 0.0195 | 0.1866 |
| ENSG00000096092 | TMEM14A      | 123.17 | 98.78  | -1.25 | 0.0285 | 0.2160 |
| ENSG00000075223 | SEMA3C       | 58.2   | 46.48  | -1.25 | 0.0403 | 0.2456 |
| ENSG00000253677 | UBE2HP1      | 27.95  | 22.32  | -1.25 | 0.0477 | 0.2610 |
| ENSG00000180574 | AC068775.1   | 38.91  | 30.97  | -1.26 | 0.0001 | 0.0266 |
| ENSG00000063046 | EIF4B        | 68.02  | 53.92  | -1.26 | 0.0014 | 0.0752 |
| ENSG00000155959 | VBP1         | 122.11 | 96.92  | -1.26 | 0.0017 | 0.0789 |
| ENSG00000080345 | RIF1         | 25.18  | 19.92  | -1.26 | 0.0033 | 0.0990 |
| ENSG00000198826 | ARHGAP11A    | 31.47  | 25.06  | -1.26 | 0.0061 | 0.1227 |
| ENSG00000144381 | HSPD1        | 794.93 | 631.61 | -1.26 | 0.0093 | 0.1449 |
| ENSG00000113593 | PPWD1        | 38.04  | 30.17  | -1.26 | 0.0113 | 0.1508 |
| ENSG00000101596 | SMCHD1       | 30.71  | 24.45  | -1.26 | 0.0143 | 0.1628 |
| ENSG00000213613 | RP11-380G5.3 | 43.09  | 34.07  | -1.26 | 0.0307 | 0.2195 |
| ENSG00000151414 | NEK7         | 48.77  | 38.64  | -1.26 | 0.0311 | 0.2202 |
| ENSG00000196369 | SRGAP2P2     | 32.39  | 25.65  | -1.26 | 0.0491 | 0.2656 |
| ENSG00000134759 | ELP2         | 143.38 | 112.49 | -1.27 | 0.0004 | 0.0580 |
| ENSG00000100592 | DAAM1        | 48.02  | 37.7   | -1.27 | 0.0004 | 0.0580 |
| ENSG00000178691 | SUZ12        | 42.8   | 33.77  | -1.27 | 0.0006 | 0.0624 |
| ENSG00000155100 | OTUD6B       | 27.7   | 21.77  | -1.27 | 0.0020 | 0.0860 |
| ENSG00000047230 | CTPS2        | 145.54 | 115.04 | -1.27 | 0.0022 | 0.0888 |
| ENSG00000117859 | OSBPL9       | 72.08  | 56.89  | -1.27 | 0.0027 | 0.0964 |
| ENSG00000145907 | G3BP1        | 118.59 | 93.17  | -1.27 | 0.0107 | 0.1505 |
| ENSG00000197312 | DDI2         | 23.8   | 18.79  | -1.27 | 0.0142 | 0.1625 |
| ENSG00000125630 | POLR1B       | 36.5   | 28.73  | -1.27 | 0.0169 | 0.1752 |
| ENSG00000138442 | WDR12        | 131.91 | 103.49 | -1.27 | 0.0294 | 0.2175 |
| ENSG00000077809 | GTF2I        | 167.61 | 132.3  | -1.27 | 0.0323 | 0.2225 |
| ENSG00000128951 | DUT          | 121.81 | 96.22  | -1.27 | 0.0365 | 0.2357 |
| ENSG00000065911 | MTHFD2       | 267.32 | 209.39 | -1.28 | 0.0004 | 0.0580 |
| ENSG00000099875 | MKNK2        | 164.43 | 128.42 | -1.28 | 0.0004 | 0.0580 |
| ENSG00000174013 | FBXO45       | 29.25  | 22.81  | -1.28 | 0.0014 | 0.0752 |
| ENSG00000136824 | SMC2         | 30.58  | 23.93  | -1.28 | 0.0021 | 0.0878 |



|                 |               |        |        |       |        |        |
|-----------------|---------------|--------|--------|-------|--------|--------|
| ENSG00000174738 | NR1D2         | 25.17  | 19.62  | -1.28 | 0.0060 | 0.1219 |
| ENSG00000115540 | PHOCN         | 109.83 | 85.78  | -1.28 | 0.0176 | 0.1787 |
| ENSG00000116001 | TIA1          | 153.56 | 119.91 | -1.28 | 0.0207 | 0.1924 |
| ENSG00000141562 | NARF          | 39.34  | 30.85  | -1.28 | 0.0226 | 0.2012 |
| ENSG00000196177 | ACADSB        | 72.22  | 56.36  | -1.28 | 0.0291 | 0.2169 |
| ENSG00000158169 | FANCC         | 23.85  | 18.67  | -1.28 | 0.0292 | 0.2169 |
| ENSG00000116191 | RALGPS2       | 97.98  | 76.38  | -1.28 | 0.0299 | 0.2195 |
| ENSG00000156273 | BACH1         | 38.83  | 30.31  | -1.28 | 0.0387 | 0.2409 |
| ENSG00000115271 | GCA           | 74.01  | 57.87  | -1.28 | 0.0442 | 0.2559 |
| ENSG00000109805 | NCAPG         | 33.28  | 25.75  | -1.29 | 0.0007 | 0.0624 |
| ENSG00000182973 | CNOT10        | 144.41 | 111.74 | -1.29 | 0.0011 | 0.0685 |
| ENSG00000100311 | PDGFB         | 103.72 | 80.26  | -1.29 | 0.0018 | 0.0810 |
| ENSG00000111530 | CAND1         | 194.39 | 150.16 | -1.29 | 0.0059 | 0.1212 |
| ENSG00000168758 | SEMA4C        | 131.27 | 102.15 | -1.29 | 0.0075 | 0.1320 |
| ENSG00000109184 | DCUN1D4       | 110.62 | 86.07  | -1.29 | 0.0106 | 0.1505 |
| ENSG00000233994 | GDI2P2        | 49.99  | 38.73  | -1.29 | 0.0188 | 0.1832 |
| ENSG00000241945 | PWP2          | 25.29  | 19.55  | -1.29 | 0.0283 | 0.2156 |
| ENSG00000160551 | TAOK1         | 31.57  | 24.38  | -1.29 | 0.0306 | 0.2195 |
| ENSG00000165659 | DACH1         | 36.71  | 28.47  | -1.29 | 0.0393 | 0.2420 |
| ENSG00000111666 | CHPT1         | 46.13  | 35.66  | -1.29 | 0.0442 | 0.2559 |
| ENSG00000166225 | FRS2          | 55.46  | 43.12  | -1.29 | 0.0451 | 0.2571 |
| ENSG00000172939 | OXR1          | 73.65  | 56.85  | -1.3  | 0.0008 | 0.0643 |
| ENSG00000152332 | UHMK1         | 62.52  | 47.95  | -1.3  | 0.0060 | 0.1219 |
| ENSG00000213430 | HSPD1P1       | 45.91  | 35.45  | -1.3  | 0.0124 | 0.1550 |
| ENSG00000139921 | TMX1          | 39.77  | 30.52  | -1.3  | 0.0137 | 0.1617 |
| ENSG00000147536 | GINS4         | 25.48  | 19.59  | -1.3  | 0.0186 | 0.1832 |
| ENSG00000155189 | AGPAT5        | 43     | 33.2   | -1.3  | 0.0335 | 0.2267 |
| ENSG00000114790 | ARHGEF26      | 25.63  | 19.65  | -1.3  | 0.0365 | 0.2357 |
| ENSG00000151093 | OXSM          | 56.8   | 43.74  | -1.3  | 0.0410 | 0.2485 |
| ENSG00000228328 | RP11-516A11.1 | 80.35  | 61.86  | -1.3  | 0.0438 | 0.2542 |
| ENSG00000095319 | NUP188        | 35.22  | 26.97  | -1.31 | 0.0003 | 0.0580 |
| ENSG00000105976 | MET           | 29.71  | 22.62  | -1.31 | 0.0076 | 0.1320 |
| ENSG00000134371 | CDC73         | 71.27  | 54.28  | -1.31 | 0.0104 | 0.1505 |
| ENSG00000112715 | VEGFA         | 142.5  | 108.52 | -1.31 | 0.0307 | 0.2197 |
| ENSG00000151498 | ACAD8         | 21.9   | 16.78  | -1.31 | 0.0386 | 0.2408 |
| ENSG00000107669 | ATE1          | 28.74  | 21.75  | -1.32 | 0.0013 | 0.0748 |
| ENSG00000137770 | CTDSPL2       | 25.36  | 19.24  | -1.32 | 0.0034 | 0.0990 |
| ENSG00000118513 | MYB           | 27.38  | 20.78  | -1.32 | 0.0061 | 0.1227 |
| ENSG00000079246 | XRCC5         | 283.63 | 215.26 | -1.32 | 0.0102 | 0.1505 |
| ENSG00000134602 | AL109749.1    | 37.62  | 28.55  | -1.32 | 0.0205 | 0.1915 |
| ENSG00000101752 | MIB1          | 28.8   | 21.83  | -1.32 | 0.0345 | 0.2295 |
| ENSG00000255302 | EID1          | 118.3  | 89.23  | -1.33 | 0.0156 | 0.1719 |
| ENSG00000072571 | HMMR          | 45.58  | 34.18  | -1.33 | 0.0231 | 0.2029 |
| ENSG00000235129 | FABP7P2       | 263.75 | 197.76 | -1.33 | 0.0330 | 0.2247 |
| ENSG00000114742 | WDR48         | 81.65  | 60.71  | -1.34 | 0.0015 | 0.0760 |
| ENSG00000117394 | SLC2A1        | 477.17 | 356.7  | -1.34 | 0.0098 | 0.1485 |
| ENSG00000166266 | CUL5          | 23.95  | 17.81  | -1.34 | 0.0118 | 0.1516 |

|                 |              |        |        |       |        |        |
|-----------------|--------------|--------|--------|-------|--------|--------|
| ENSG00000241061 | AC090602.1   | 33.13  | 24.69  | -1.34 | 0.0217 | 0.1960 |
| ENSG00000179941 | BBS10        | 22.91  | 17.06  | -1.34 | 0.0263 | 0.2129 |
| ENSG00000224834 | BTF3P9       | 49.57  | 37.1   | -1.34 | 0.0271 | 0.2130 |
| ENSG00000182552 | RWDD4        | 25.46  | 19.01  | -1.34 | 0.0470 | 0.2610 |
| ENSG00000096717 | SIRT1        | 30.53  | 22.55  | -1.35 | 0.0004 | 0.0580 |
| ENSG00000135549 | PKIB         | 90.93  | 67.11  | -1.35 | 0.0023 | 0.0900 |
| ENSG00000108021 | C10orf18     | 61.81  | 45.68  | -1.35 | 0.0026 | 0.0957 |
| ENSG00000181751 | C5orf30      | 38.31  | 28.41  | -1.35 | 0.0029 | 0.0982 |
| ENSG00000235847 | LDHAP7       | 29.58  | 21.88  | -1.35 | 0.0216 | 0.1960 |
| ENSG00000120868 | APAF1        | 36.38  | 26.77  | -1.36 | 0.0069 | 0.1274 |
| ENSG00000128928 | IVD          | 161.33 | 118.28 | -1.36 | 0.0104 | 0.1505 |
| ENSG00000114439 | BBX          | 72.15  | 52.86  | -1.36 | 0.0315 | 0.2207 |
| ENSG00000163605 | PPP4R2       | 42.97  | 31.46  | -1.37 | 0.0029 | 0.0982 |
| ENSG00000139354 | GAS2L3       | 19.39  | 14.13  | -1.37 | 0.0109 | 0.1508 |
| ENSG00000100968 | NFATC4       | 45.51  | 33.2   | -1.37 | 0.0145 | 0.1642 |
| ENSG00000181192 | DHTKD1       | 111.91 | 81.5   | -1.37 | 0.0266 | 0.2130 |
| ENSG00000116984 | MTR          | 20.6   | 14.95  | -1.38 | 0.0011 | 0.0685 |
| ENSG00000164118 | CEP44        | 20.75  | 15.03  | -1.38 | 0.0049 | 0.1124 |
| ENSG00000122884 | P4HA1        | 204.87 | 148.36 | -1.38 | 0.0113 | 0.1508 |
| ENSG00000183044 | ABAT         | 54.82  | 39.81  | -1.38 | 0.0113 | 0.1508 |
| ENSG00000172795 | DCP2         | 37.51  | 27.16  | -1.38 | 0.0131 | 0.1587 |
| ENSG00000198060 | 42068        | 55.7   | 39.99  | -1.39 | 0.0045 | 0.1094 |
| ENSG00000257315 | ZBED6        | 40.94  | 29.38  | -1.39 | 0.0076 | 0.1320 |
| ENSG00000134333 | LDHA         | 857.98 | 617.39 | -1.39 | 0.0085 | 0.1374 |
| ENSG00000125089 | SH3TC1       | 37.7   | 26.9   | -1.4  | 0.0048 | 0.1124 |
| ENSG00000152256 | PDK1         | 27.62  | 19.7   | -1.4  | 0.0094 | 0.1449 |
| ENSG00000113328 | CCNG1        | 236.48 | 169.38 | -1.4  | 0.0107 | 0.1505 |
| ENSG00000184661 | CDCA2        | 41.28  | 29.42  | -1.4  | 0.0107 | 0.1505 |
| ENSG00000136295 | TTYH3        | 38.5   | 27.33  | -1.41 | 0.0066 | 0.1257 |
| ENSG00000243988 | RP11-325K4.1 | 43.78  | 31.1   | -1.41 | 0.0129 | 0.1587 |
| ENSG00000102290 | PCDH11X      | 24.19  | 17.1   | -1.41 | 0.0139 | 0.1617 |
| ENSG00000244165 | P2RY11       | 19.33  | 13.69  | -1.41 | 0.0281 | 0.2153 |
| ENSG00000247095 | MIR210HG     | 33.7   | 23.7   | -1.42 | 0.0033 | 0.0990 |
| ENSG00000181788 | SIAH2        | 209.23 | 147.71 | -1.42 | 0.0140 | 0.1617 |
| ENSG00000180694 | TMEM64       | 31.24  | 22.02  | -1.42 | 0.0157 | 0.1724 |
| ENSG00000127663 | KDM4B        | 17.5   | 12.22  | -1.43 | 0.0055 | 0.1181 |
| ENSG00000105220 | GPI          | 277.77 | 193.88 | -1.43 | 0.0084 | 0.1371 |
| ENSG00000170802 | FOXN2        | 26.94  | 18.71  | -1.44 | 0.0050 | 0.1124 |
| ENSG00000180233 | ZNRF2        | 47.09  | 32.76  | -1.44 | 0.0213 | 0.1957 |
| ENSG00000068650 | ATP11A       | 16.22  | 11.15  | -1.45 | 0.0202 | 0.1908 |
| ENSG00000134324 | LPIN1        | 19.8   | 13.59  | -1.46 | 0.0027 | 0.0964 |
| ENSG00000206878 | SNORA51      | 46.66  | 31.96  | -1.46 | 0.0033 | 0.0990 |
| ENSG00000086300 | SNX10        | 17.01  | 11.66  | -1.46 | 0.0042 | 0.1052 |
| ENSG00000171428 | NAT1         | 96.44  | 65.99  | -1.46 | 0.0079 | 0.1321 |
| ENSG00000130827 | PLXNA3       | 184.2  | 126.1  | -1.46 | 0.0329 | 0.2244 |
| ENSG00000186918 | ZNF395       | 61.35  | 41.69  | -1.47 | 0.0001 | 0.0394 |
| ENSG00000091831 | ESR1         | 51.91  | 35.32  | -1.47 | 0.0130 | 0.1587 |

|                 |                |         |         |       |        |        |
|-----------------|----------------|---------|---------|-------|--------|--------|
| ENSG00000084628 | NKAIN1         | 30.46   | 20.78   | -1.47 | 0.0326 | 0.2238 |
| ENSG00000235674 | LDHAP2         | 29.89   | 20.38   | -1.47 | 0.0398 | 0.2434 |
| ENSG00000168209 | DDIT4          | 277.29  | 188.17  | -1.47 | 0.0468 | 0.2610 |
| ENSG00000119950 | MXI1           | 62.36   | 42.16   | -1.48 | 0.0093 | 0.1449 |
| ENSG00000147394 | ZNF185         | 32.52   | 21.96   | -1.48 | 0.0174 | 0.1768 |
| ENSG00000026508 | CD44           | 61.56   | 41.65   | -1.48 | 0.0194 | 0.1861 |
| ENSG00000162433 | AK4            | 21.52   | 14.49   | -1.49 | 0.0010 | 0.0685 |
| ENSG00000067057 | PFKP           | 182.59  | 122.15  | -1.49 | 0.0032 | 0.0990 |
| ENSG00000231397 | AC004941.5     | 25.79   | 17.36   | -1.49 | 0.0472 | 0.2610 |
| ENSG00000151718 | WWC2           | 76.79   | 51.29   | -1.5  | 0.0002 | 0.0444 |
| ENSG00000111885 | MAN1A1         | 61.09   | 40.68   | -1.5  | 0.0034 | 0.0990 |
| ENSG00000239887 | C1orf226       | 21.68   | 14.48   | -1.5  | 0.0104 | 0.1505 |
| ENSG00000122741 | DCAF10         | 112.31  | 74.47   | -1.51 | 0.0002 | 0.0473 |
| ENSG00000185900 | AC113191.1     | 16.8    | 11.09   | -1.51 | 0.0174 | 0.1768 |
| ENSG00000108352 | RAPGEFL1       | 36.89   | 24.37   | -1.51 | 0.0341 | 0.2288 |
| ENSG00000177181 | RIMKLA         | 23.1    | 15.24   | -1.52 | 0.0026 | 0.0957 |
| ENSG00000196233 | LCOR           | 19.04   | 12.52   | -1.52 | 0.0250 | 0.2083 |
| ENSG00000196208 | GREB1          | 197.26  | 129.71  | -1.52 | 0.0272 | 0.2130 |
| ENSG00000182185 | RAD51B         | 20.07   | 13.14   | -1.53 | 0.0033 | 0.0990 |
| ENSG00000143228 | NUF2           | 62.76   | 41.11   | -1.53 | 0.0036 | 0.1003 |
| ENSG00000118707 | TGIF2          | 23.45   | 15.34   | -1.53 | 0.0085 | 0.1374 |
| ENSG00000102144 | PGK1           | 3209.49 | 2088.45 | -1.54 | 0.0051 | 0.1124 |
| ENSG00000113389 | NPR3           | 16.02   | 10.39   | -1.54 | 0.0138 | 0.1617 |
| ENSG00000115548 | KDM3A          | 96.95   | 62.12   | -1.56 | 0.0048 | 0.1124 |
| ENSG00000120913 | PDLIM2         | 19.09   | 12.17   | -1.57 | 0.0045 | 0.1094 |
| ENSG00000114268 | PFKFB4         | 32.24   | 20.4    | -1.58 | 0.0032 | 0.0990 |
| ENSG00000254815 | RP11-496I9.1   | 20.69   | 13.11   | -1.58 | 0.0225 | 0.2001 |
| ENSG00000229729 | RP11-159G9.5   | 19.31   | 12.13   | -1.59 | 0.0045 | 0.1094 |
| ENSG00000006747 | SCIN           | 18.65   | 11.74   | -1.59 | 0.0199 | 0.1890 |
| ENSG00000104765 | BNIP3L         | 156.56  | 97.89   | -1.6  | 0.0014 | 0.0752 |
| ENSG00000213290 | CTD-2192J16.12 | 49.36   | 30.63   | -1.61 | 0.0124 | 0.1550 |
| ENSG00000196968 | FUT11          | 54.07   | 33.28   | -1.62 | 0.0027 | 0.0964 |
| ENSG00000104419 | NDRG1          | 1292.75 | 796.87  | -1.62 | 0.0268 | 0.2130 |
| ENSG00000197358 | BNIP3P1        | 22.71   | 13.75   | -1.65 | 0.0160 | 0.1734 |
| ENSG00000061656 | SPAG4          | 37.69   | 22.74   | -1.66 | 0.0099 | 0.1485 |
| ENSG00000159399 | HK2            | 77.27   | 46.34   | -1.67 | 0.0036 | 0.1003 |
| ENSG00000169906 | S100G          | 63.51   | 37.83   | -1.68 | 0.0013 | 0.0739 |
| ENSG00000162891 | IL20           | 144.52  | 85.96   | -1.68 | 0.0239 | 0.2058 |
| ENSG00000003989 | SLC7A2         | 18.01   | 10.66   | -1.69 | 0.0009 | 0.0653 |
| ENSG00000170525 | PFKFB3         | 100.92  | 58.95   | -1.71 | 0.0007 | 0.0624 |
| ENSG00000186868 | MAPT           | 46.76   | 27.2    | -1.72 | 0.0118 | 0.1516 |
| ENSG00000186352 | ANKRD37        | 87.3    | 50.32   | -1.73 | 0.0241 | 0.2058 |
| ENSG00000141526 | SLC16A3        | 41.04   | 23.54   | -1.74 | 0.0015 | 0.0760 |
| ENSG00000105974 | CAV1           | 18.04   | 10.38   | -1.74 | 0.0384 | 0.2408 |
| ENSG00000124785 | NRN1           | 29.13   | 16.5    | -1.77 | 0.0010 | 0.0685 |
| ENSG00000228206 | AC016717.1     | 107.33  | 60.04   | -1.79 | 0.0382 | 0.2406 |
| ENSG00000176171 | BNIP3          | 65.47   | 35.07   | -1.87 | 0.0000 | 0.0198 |

|                 |               |        |        |       |        |        |
|-----------------|---------------|--------|--------|-------|--------|--------|
| ENSG00000124126 | PREX1         | 42.58  | 22.57  | -1.89 | 0.0368 | 0.2361 |
| ENSG00000182952 | HMGH4         | 85.48  | 44.89  | -1.9  | 0.0014 | 0.0752 |
| ENSG00000142973 | CYP4B1        | 75.56  | 39.6   | -1.91 | 0.0011 | 0.0685 |
| ENSG00000239063 | snoU13        | 40.24  | 21.07  | -1.91 | 0.0391 | 0.2420 |
| ENSG00000255824 | AL590369.1    | 11.55  | 5.82   | -1.98 | 0.0436 | 0.2541 |
| ENSG00000240941 | AC021311.1    | 26.03  | 12.16  | -2.14 | 0.0254 | 0.2098 |
| ENSG00000212312 | 5S_rRNA       | 577.67 | 266.67 | -2.17 | 0.0099 | 0.1487 |
| ENSG00000228041 | RP4-581F12.1  | 51.53  | 23.7   | -2.17 | 0.0107 | 0.1505 |
| ENSG00000252786 | U6            | 37.21  | 17.06  | -2.18 | 0.0112 | 0.1508 |
| ENSG00000238975 | snoU13        | 117.25 | 51.07  | -2.3  | 0.0140 | 0.1617 |
| ENSG00000212330 | U6            | 59.88  | 25.79  | -2.32 | 0.0451 | 0.2571 |
| ENSG00000241069 | CTD-3141N22.1 | 33.31  | 13.38  | -2.49 | 0.0483 | 0.2629 |
| ENSG00000170323 | FABP4         | 16.58  | 6.56   | -2.53 | 0.0304 | 0.2195 |
| ENSG00000188389 | PDCD1         | 13.31  | 5.05   | -2.64 | 0.0184 | 0.1832 |
| ENSG00000164879 | CA3           | 21.34  | 6.43   | -3.32 | 0.0383 | 0.2408 |
| ENSG00000253294 | IGHVII-40-1   | 161.17 | 46.32  | -3.48 | 0.0321 | 0.2222 |
| ENSG00000256349 | CTD-3074O7.11 | 8      | 1.94   | -4.12 | 0.0304 | 0.2195 |

**a** Transcription Factor Network List

| # | Network           | p-Value    | zScore | Total nodes | Seed nodes |
|---|-------------------|------------|--------|-------------|------------|
| 1 | CREB1             | 0.000E+00  | 219.95 | 212         | 211        |
| 2 | c-Myc             | 0.000E+00  | 188.31 | 156         | 155        |
| 3 | ESR1 (nuclear)    | 7.680E-261 | 157.67 | 108         | 108        |
| 4 | SP1               | 2.370E-256 | 156.21 | 108         | 107        |
| 5 | Androgen receptor | 3.270E-239 | 150.96 | 101         | 100        |
| 6 | HIF1A             | 7.000E-232 | 148.65 | 98          | 97         |

**b** Enriched pathway-based sets

| p-value     | q-value     | pathway                                               |
|-------------|-------------|-------------------------------------------------------|
| 6.23E-07    | 5.11E-05    | HIF-1-alpha transcription factor network              |
| 0.000213722 | 0.008762622 | Direct p53 effectors                                  |
| 0.001656723 | 0.034772856 | HIF-2-alpha transcription factor network              |
| 0.001696237 | 0.034772856 | Validated targets of C-MYC transcriptional activation |
| 0.004065926 | 0.066681194 | Coregulation of Androgen receptor activity            |
| 0.008671731 | 0.108036049 | Regulation of Androgen receptor activity              |
